# Supplementary material
Source: PubMed Central journal article supplement (PMC3483452)

**Separate Fe-S Scaffold And Carrier Functions For SufB<sub>2</sub>C<sub>2</sub> And SufA During  
In Vitro Maturation Of [2Fe-2S] Fdx**

**Harsimranjit K. Chahal and F. Wayne Outten**

Department of Chemistry and Biochemistry, University of South Carolina, Columbia, South Carolina  
29208.

Running title: Fe-S cluster trafficking in the Suf system

Address correspondence to: F. Wayne Outten, Department of Chemistry and Biochemistry, University  
of South Carolina, 631 Sumter Street, Columbia, SC 29208. Fax: 803-777-9521; Email:  
wayne.outten@chem.sc.edu

**SUPPLEMENTAL INFORMATION**

## FIGURE LEGENDS

**Fig. S1. UV-Visible spectra of holo proteins.** *A*, UV-visible spectra of holo-SufB<sub>2</sub>C<sub>2</sub> (red trace) or holo-SufBC<sub>2</sub>D (black trace). *B*, UV-visible spectrum of holo-SufA. All proteins were reconstituted *in vitro* as described in Experimental Procedures.

**Fig. S2. Fdx matured from [4Fe-4S] SufB<sub>2</sub>C<sub>2</sub>, [4Fe-4S] SufBC<sub>2</sub>D, or [2Fe-2S] SufA.** *A*, CD spectra of 200 μM of apo-Fdx after 18 h incubation with 300 μM each of holo-SufB<sub>2</sub>C<sub>2</sub> (red), holo-SufBC<sub>2</sub>D (black), or holo-SufA (blue). Dashed line shows the CD spectrum of 200 μM of holo-Fdx (as-purified from *E. coli*). *B*, CD spectra of transfer at 80 min from holo-SufBC<sub>2</sub>D (290 μM) to apo-Fdx (200 μM) in the presence (red) and absence (black) of 60 μM of EDTA (red), reconstitution on apo-Fdx in the presence of FAS (652 μM) and Na<sub>2</sub>S (687 μM) in the presence of 60 μM of EDTA (blue)

**Fig. S3. Separation of proteins following de novo cluster assembly.** UV-Visible spectra of (*A*) His<sub>6</sub>-SufB<sub>2</sub>C<sub>2</sub>, (*C*) His<sub>6</sub>-SufBC<sub>2</sub>D, or (*E*) His<sub>6</sub>-SufA (red lines) and Fdx (black line) after co-incubation with iron and sulfide for 20 min and separation via a Ni<sup>2+</sup>-NTA column. CD spectra of (*B*) His<sub>6</sub>-SufB<sub>2</sub>C<sub>2</sub>, (*D*) His<sub>6</sub>-SufBC<sub>2</sub>D, or (*F*) His<sub>6</sub>-SufA (red lines) and Fdx (black line) after co-incubation with iron and sulfide for 20 min and separation via a Ni<sup>2+</sup>-NTA column.

**Fig. S4. De novo Fe-S cluster assembly on Fdx in the presence of SufB<sub>2</sub>C<sub>2</sub>, SufBC<sub>2</sub>D, or SufA using SufS-SufE-L-cysteine as the sulfur donor.** Comparison of cluster formation using FAS (1 mM), SufS-SufE (0.8 μM each), and L-cysteine (1 mM) on Fdx alone (filled triangles) or Fdx in the presence of apo-SufB<sub>2</sub>C<sub>2</sub> (squares), apo-SufBC<sub>2</sub>D (diamonds), or apo-SufA (circles). Holo-Fdx formation was calculated by comparing the changes in ellipticity at 434 nm with the 434 nm ellipticity of 100% [2Fe-2S] Fdx prepared separately.

**Fig. S5. Fdx matured in the presence of catalytic amounts of SufB<sub>2</sub>C<sub>2</sub>, SufBC<sub>2</sub>D, or SufA.** *A*, Rate of cluster formation on Fdx in the presence (squares) and absence (triangles) of catalytic amounts of apo-SufB<sub>2</sub>C<sub>2</sub>. *B*, Rate of cluster formation on Fdx in the presence (diamonds) and absence (triangles) of

catalytic amounts of apo-SufBC<sub>2</sub>D. *C*, Rate of cluster formation on Fdx in the presence (circles) and absence (triangles) of catalytic amounts of apo-SufA. Rates of Fdx formation were calculated by monitoring changes in ellipticity at single wavelength 434 nm of a solution containing 10 μM of apo-SufB<sub>2</sub>C<sub>2</sub>, apo-SufBC<sub>2</sub>D, or apo-SufA with 1 mM each FAS and Na<sub>2</sub>S and various amounts of apo-Fdx.

**Fig. S6. Separation of proteins following Fe-S cluster transfer from SufA to Fdx.** *A*, UV-Visible spectra of holo-His<sub>6</sub>-SufA (red line) before loading onto the Ni<sup>2+</sup>-NTA column and spectra of Fdx (black line) and His<sub>6</sub>-SufA (dashed line) eluted separately after co-incubation on the Ni<sup>2+</sup>-NTA column for 20 min. *B*, CD spectra of Fdx (black line) and His<sub>6</sub>-SufA (dashed line) isolated after co-incubation on the Ni<sup>2+</sup>-NTA column for 20 min.

Fig. S1

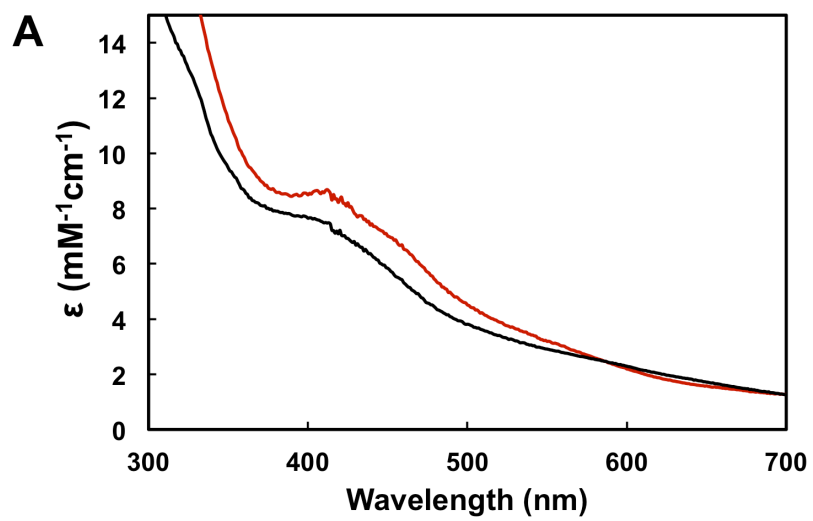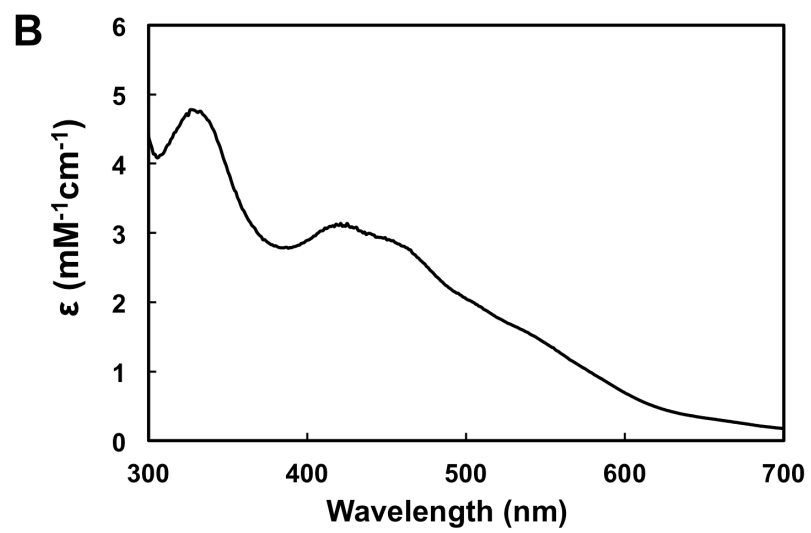

Fig. S2

A

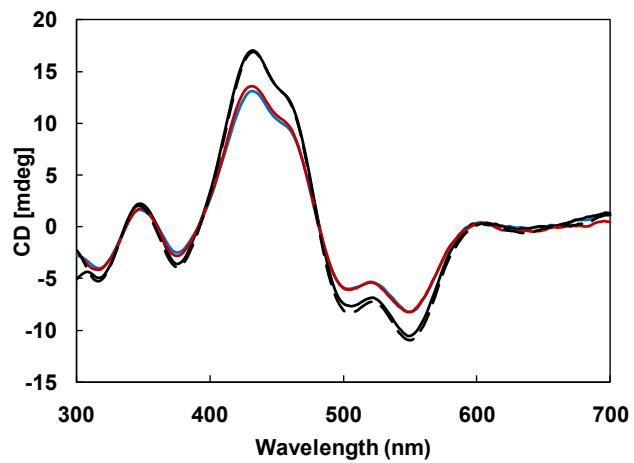

B

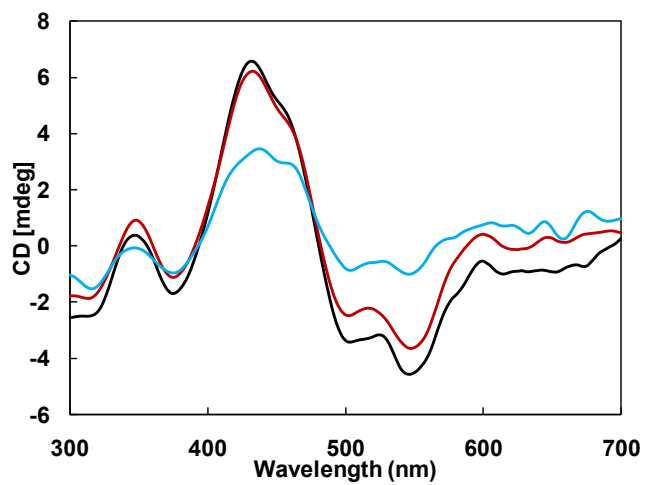

Fig. S3

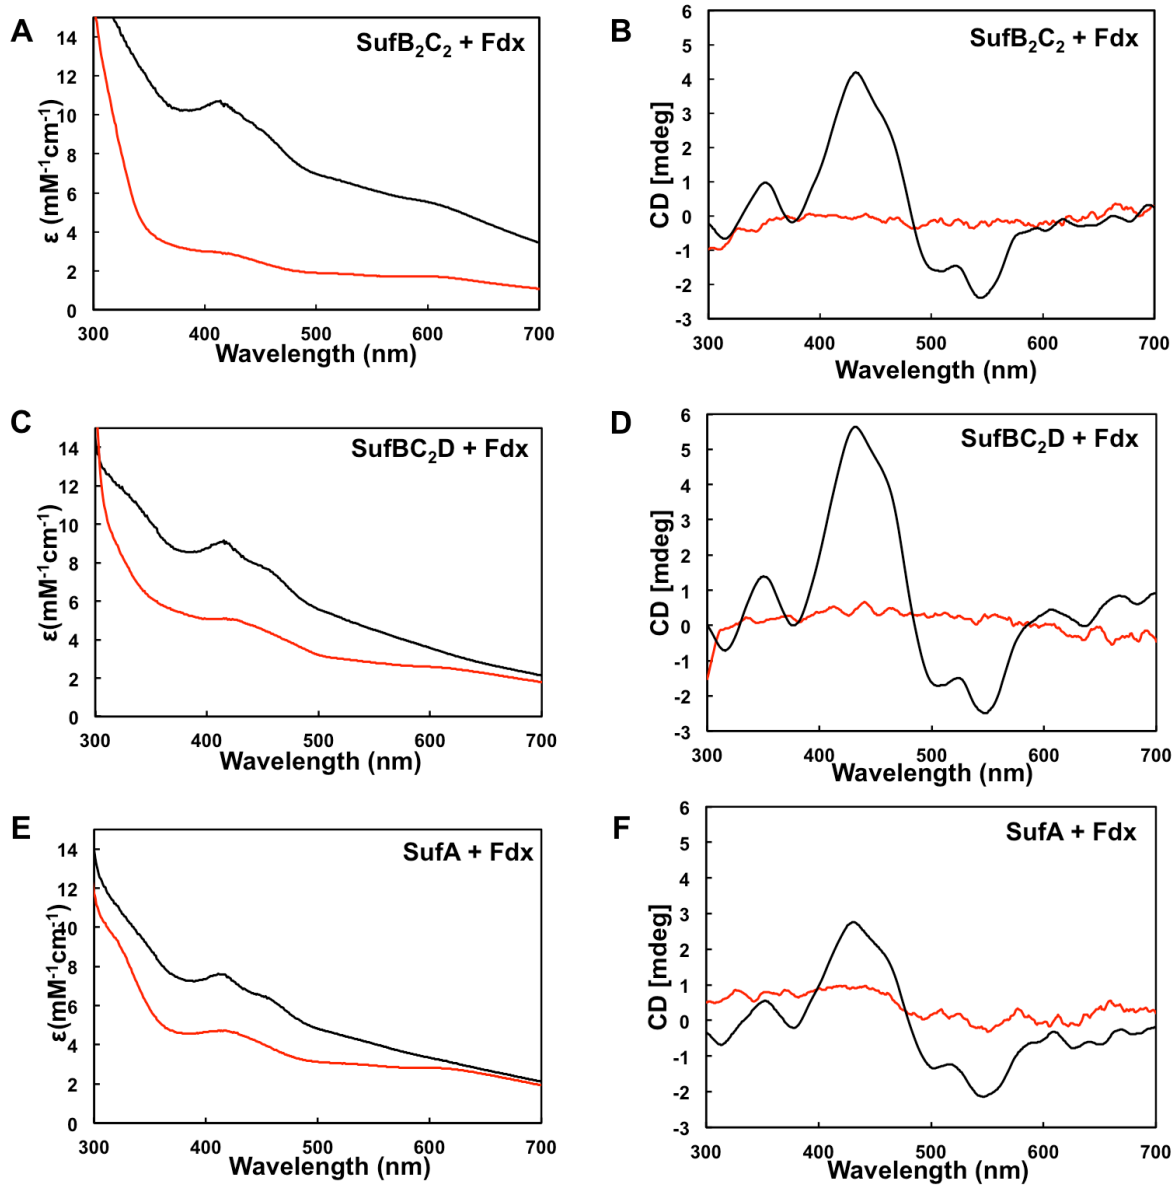

Fig. S4

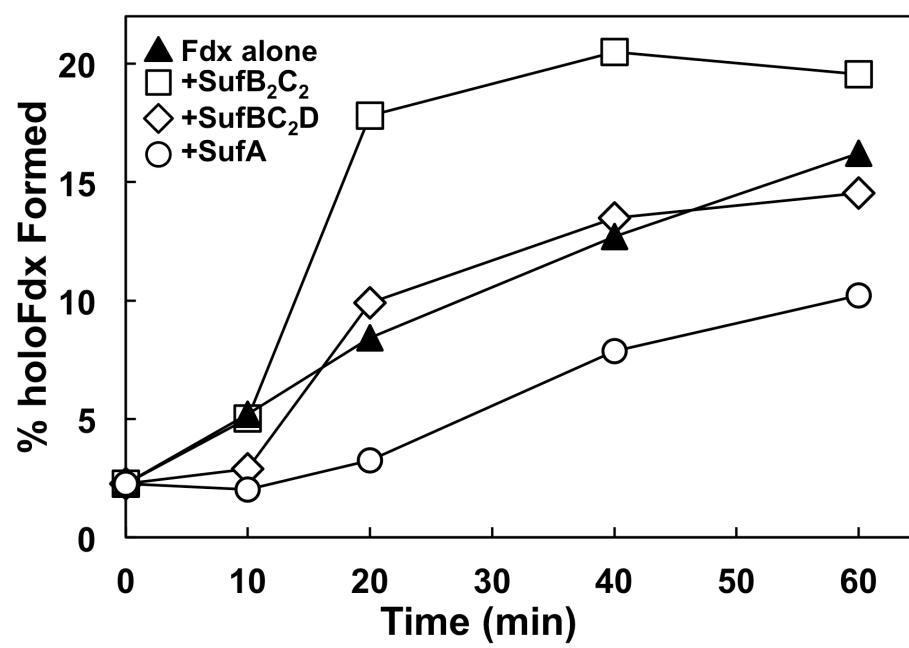

Fig. S5

A

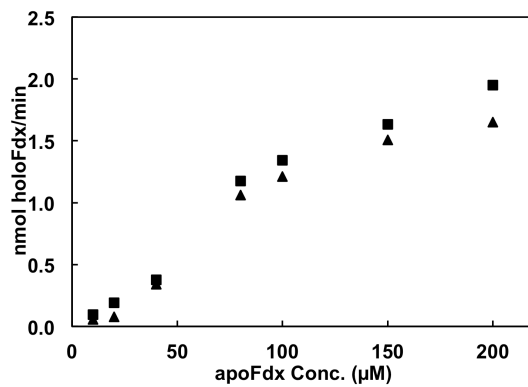

B

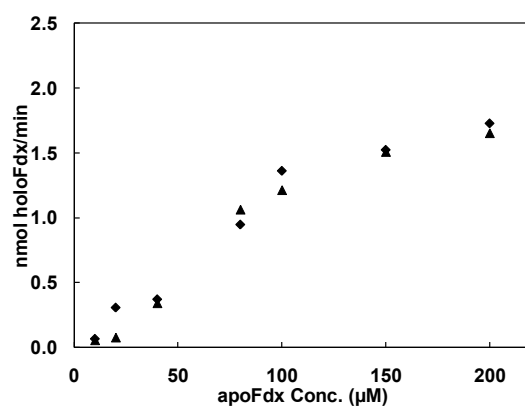

C

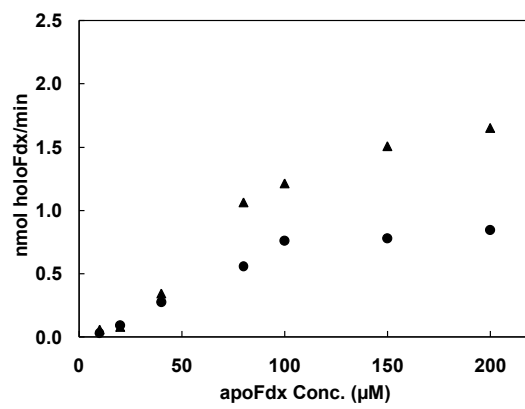



Fig. S6

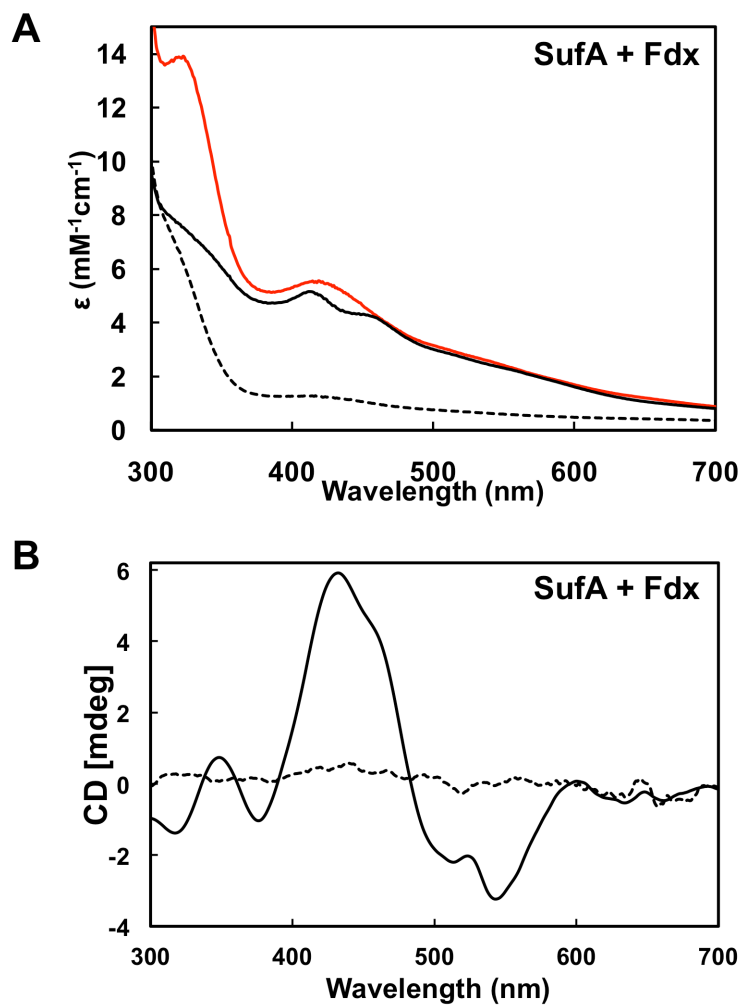

Supplement: NIHMS388473-supplement-01.pdf [file NIHMS388473-supplement-01.pdf]
